# Supplementary material
Source: publisher figshare collection journal article supplement (https://wiley.figshare.com/articles/dataset/_/3550200)
Supplement: Supplementary file 1 [file 1 › appendix-B.htm]

Ecological Archives E091-239-A2


### *Ecological Archives* E091-239-A2

### **Beth Gardner, Juan Reppucci, Mauro Lucherini, and J. Andrew Royle. 2010. Spatially explicit inference for open populations: estimating demographic parameters from camera-trap studies. *Ecology* 91:3376–3383.**

Appendix B. Survival and recruitment for *T* > 2.

> View / download PDF.

---


[Back to E091-239]
